# Supplementary material for: Design of a self-sufficient hydride-shuttling cascade for concurrent bioproduction of 7,12-dioxolithocholate andl-tert-leucine
Source: Royal Society of Chemistry journal article supplement (doi:10.1039/d1gc01120k), 2021-01-01
Supplement: d1gc01120k1.pdf [file d1gc01120k1.pdf]

## Electrical Supporting Information

### Design of a self-sufficient hydride-shuttling cascade for concurrent bioproduction of 7,12-dioxolithocholate and L-*tert*-leucine

Zhi-Neng You,<sup>†</sup> Ke Zhou,<sup>†</sup> Yu Han,<sup>†</sup> Bing-Yi Yang,<sup>†</sup> Qi Chen,<sup>†,‡</sup> Jiang Pan,<sup>†,‡</sup> Xiao-Long  
Qian,<sup>§</sup> Chun-Xiu Li,<sup>\*,†,‡</sup> and Jian-He Xu<sup>\*,†,‡</sup>

<sup>†</sup>Laboratory of Biocatalysis and Synthetic Biotechnology, State Key Laboratory of Bioreactor Engineering, East China University of Science and Technology, 130 Meilong Road, Shanghai 200237, China

<sup>‡</sup>Shanghai Collaborative Innovation Center for Biomanufacturing, School of Biotechnology, East China University of Science and Technology, 130 Meilong Road, Shanghai 200237, China

<sup>§</sup>Suzhou Bioforany EnzyTech Co. Ltd., No. 8 Yanjiuyuan Road, Economic Development Zone, Changshu, Jiangsu 215512, China

\*Correspondence should be addressed to C.X.L. and J.H.X.: [chunxiuli@ecust.edu.cn](mailto:chunxiuli@ecust.edu.cn); [jianhexu@ecust.edu.cn](mailto:jianhexu@ecust.edu.cn)

# Contents

|                                                                                                                             |            |
|-----------------------------------------------------------------------------------------------------------------------------|------------|
| <b>1. Experimental Section.....</b>                                                                                         | <b>S3</b>  |
| General information .....                                                                                                   | S3         |
| Gene sequences .....                                                                                                        | S3         |
| Calculation of E factors.....                                                                                               | S5         |
| <b>2. Supporting Tables.....</b>                                                                                            | <b>S9</b>  |
| Table S1. Primers used for constructing recombinant <i>E. coli</i> strains .....                                            | S9         |
| Table S2. Strains and plasmids used in this study .....                                                                     | S10        |
| <b>3. Supporting Figures .....</b>                                                                                          | <b>S12</b> |
| Figure S1. Synthesis of UDCA from CA by chemical (A) or chemo-enzymatic methods (B and C).. .....                           | S12        |
| Figure S2. Currently available NAD(P) <sup>+</sup> -recycling systems for the biocatalytic oxidation of CA. ....            | S13        |
| Figure S3. Reaction progress curves of the self-sufficient hydride-shuttling cascade via <i>in vitro</i> biocatalysis ..... | S14        |
| Figure S4. SDS-PAGE analysis of whole-cell proteins expressed in selected <i>E. coli</i> strains. ....                      | S15        |
| Figure S5. A detailed synthetic roadmap of the smart self-sufficient hydride-shuttling cascade.....                         | S16        |
| Figure S6. Calibration curves.....                                                                                          | S17        |
| <b>4. HPLC spectra .....</b>                                                                                                | <b>S18</b> |
| <b>5. <sup>1</sup>H NMR and <sup>13</sup>C NMR spectra .....</b>                                                            | <b>S22</b> |
| <b>6. References .....</b>                                                                                                  | <b>S24</b> |

# 1. Experimental Section

## 1.1 General information

Cholic acid (3 $\alpha$ ,7 $\alpha$ ,12 $\alpha$ -trihydroxy-5 $\beta$ -cholanic acid; CA), deoxycholic acid (3 $\alpha$ ,12 $\alpha$ -dihydroxy-5 $\beta$ -cholanoic acid; DCA), and chenodeoxycholic acid (3 $\alpha$ ,7 $\alpha$ -dihydroxy-5 $\beta$ -cholanic acid; CDCA) were purchased from Aladdin Reagents Co., Ltd. (Shanghai, China). Trimethylpyruvic acid (TMP) and L-*tert*-leucine were obtained from Adamas Reagent Co., Ltd. (Shanghai, China). Standards of 7-oxo-deoxycholic acid (3 $\alpha$ ,12 $\alpha$ -dihydroxy-7-oxo-5 $\beta$ -cholanic acid; 7-oxo-DCA), 12-oxo-chenodeoxycholic acid (3 $\alpha$ ,7 $\alpha$ -dihydroxy-12-oxo-5 $\beta$ -cholanic acid; 12-oxo-CDCA), and 7,12-dioxo-lithocholic acid (3 $\alpha$ -hydroxy-7,12-dioxo-5 $\beta$ -cholanoic acid; 7,12-dioxo-LCA) were enzymatically synthesized in our previous work.<sup>S1</sup> Unless otherwise specified, all other chemicals and reagents were obtained commercially and were of reagent grade. PrimeSTAR™ HS, Taq DNA polymerase, and restriction endonucleases were all purchased from Takara Biotechnology Co., Ltd. (Dalian, China). The Gibson assembly kit was purchased from Vazyme Biotech Co., Ltd. (Nanjing, China). *E. coli* DH5 $\alpha$  and *E. coli* BL21 (DE3) were used as hosts for gene cloning and protein expression, respectively. Plasmids pET-28a (+), pETDuet-1, and pRSFDuet-1 (Novagen, Shanghai, China) were used for the heterogeneous expression of recombinant protein. The recombinant plasmids pET28a (+)-*Ec*7 $\alpha$ -HSDH, pET28a (+)-*Rr*12 $\alpha$ -HSDH and pET28a (+)-*Es*LeuDH were previously constructed by our laboratory.<sup>S1-S3</sup> The molar yield of 7,12-dioxo-LCA were determined by HPLC analysis using a Shimadzu LC-2010A high performance liquid chromatography equipped with an Hypersil ODS2 column (250 mm  $\times$  4.6 mm, 5  $\mu$ m particle size, Elite) and a UV detector. <sup>1</sup>H NMR and <sup>13</sup>C NMR were measured on a Bruker Ascend spectrometer.

## 1.2 Gene sequences

### Gene sequence of *Rr*12 $\alpha$ -HSDH (GenBank: QDC17258.1)

```
ATGAAACTGCGCGGAAGACCGCCGTCGTCACCGGCGGTGCGGGCGGGATCGGCCGCGCGGTGACCCGCG  
TGTTTCGTCGCGAGGGCGCCCGGTGCTGTTTCGTCGACGTCGACGACGATCGGGGGCGCGCGCTCGAGTCC  
GAGCTGACCGGGGCCGCGGTGAGGCGAAGTTCCTGCAGGCCGACATCTCCCGCGCGAGAGCGCGGACC  
AGATCCGCGACGCCCGCTCGCGGCGTTCGGCGGCATCGACATCTGGTCAACAACGCGCACGCGTCGCGC
```

CAGGCACTGCTGGTTCGAGCACACCCCGGAGATGTTTCGAGCTGTCGTTTCGGCACGGGGTTCTACCCACCGTG  
CACCTCATGCAGGCCTGCTACCCGCAGCTCAAGCAGGCCCGGGTTCCGTCGTCAACTTCGGCTCCGGGTCC  
GCCCTCGACGGCATGCCGACGCAGACGTTCGTACGCGCGGCGAAGGAGGCGATCCGGGCGGTTCAGCCGGG  
TGGCCGCGAACGAATGGGCCGCGACGGCATCCGCGTCAACGTCGTGTGCCCGTTTCGCCGCGACCGAAGGC  
GTGCAGGCCTGGCAGCAGGCGTTCCCCGACCGGGCGGCCCGCGGGCGAAGGTGCCGTTGCAGCGCA  
TCGGCGACCCGGAGACGGACATCGCGCCGGTGGTGGTTCCTCGCCTCCGACGACTCGAAGTACATGACG  
GGCAGACGCTGATGGCCGACGGGGGCAGCATCAAGCTGCGGTGA

**Gene sequence of *Ec7 $\alpha$ -HSDH* (GenBank: BAA01384.1)**

GTGTTTAATTCTGACAACCTGAGACTCGACGGAAAATGCGCCATCATCACAGGTGCGGGTGCAGGTATTGGT  
AAAGAAATCGCCATTACATTCGCGACAGCTGGCGCATCTGTGGTGGTCAGTGATATTAACGCCGACGCAGCT  
AACCATGTTGTAGACGAAATTCAACAACCTGGGTGGTCAGGCATTTGCCTGCCGTTGTGATATACTTCCGAAC  
AGGAACTCTCTGCACTGGCAGACTTTGCTATCAGTAAGCTGGGTAAAGTTGATATTCTGGTTAACAACGCCG  
GTGGCGGTGGACCTAAACCGTTTGATATGCCAATGGCGGATTTTCGCCGTGCTTATGAACTGAATGTGTTTTTC  
TTTTTCCATCTGTCACAACCTTGTGCGCCAGAAATGGAAAAAATGGCGGTGGCGTTATTCTGACCATCACT  
TCTATGGCGGCAGAAAATAAAAATATAAACATGACTTCCTATGCATCATCTAAAGCTGCGGCCAGTCATCTGG  
TCAGAAATATGGCGTTTGACCTGGGTGAAAAAATATTCGGGTAAATGGCATTGCGCCGGGGGCAATATTA  
ACCGATGCCCTGAAATCCGTTATTACACCAGAAATTGAACAAAAAATGTTACAGCACACGCCGATCAGACGT  
CTGGGCCAACCGCAAGATATTGCTAACGCAGCGCTGTTCTTTGCTCGCCTGCTGCGAGCTGGGTAAGCGGA  
CAAATTCTCACCGTCTCCGGTGGTGGGGTACAGGAGCTCAATTA

**Gene sequence of *EsLeuDH* (GenBank: ACB60396.1)**

ATGGTTGAAACAAACGTAGAAAGCACGATTCAGTATTTTCGAAACGATGGCAATGGAAGATTACGAACAAGTC  
GTATTTTGTACGATAAAGTCTCAGGATTAAGGGCATTATCGCGATTCATGATACGACACTCGGACCAGCA  
CTCGGCGGACTCCGTATGTGGAACCTATGCGTCTGACGAGGAAGCATTGATCGACGCGCTTCGTTTGGCAAAA  
GGCATGACGTATAAAAATGCGGCAGCCGGTCTGAACCTTGGCGGCGGGAAAGCGGTCATCATCGGTGATGC  
GAAAACGCAAAAATCAGAAGCTCTGTTCCGTGCATTCGGTCGTTACGTACAGTCGTTAAACGGACGTTACAT  
CACTGCGGAAGACGTCAACACAACAGTCGCCGACATGGATTATATCCACATGGAAACAGATTTTCGTAACCGG  
TGTCAGCCCGGCATTCGGATCAAGCGGCAATCCGTCACCAGTCACGGCTTATGGCGTTTACCGCGGAATGAA  
GGCAGCCGCTAAAGAAGTATATGGCACAGATTCCTCGGAGGAAAAACAGTTGCGATTCAAGGTGTTGGTA

ACGTTGCTTTCAACCTATGCCGTCACTTGCATGAAGAAGGCGCAAAATTGATTGTCACAGACATCAATCAAGA  
 TGCATTACGCCGTGCAGAAGAAGCGTTTGGCGCTCTCGTCGTCGGACCGGATGAAATTTACAGCGTCGATGC  
 CGATATCTTTGCGCCGTGTGCCTTAGGTGCGACATTGAACGATGAGACGATTCCACAACCTGAAAGTGAAAAT  
 CATTGCCGGAGCAGCAAACAACCAACTCAAAGAAGATCGTCACGGAGATATGCTCCAGGAACGCGGTATTTT  
 ATATACACCGGACTTCGTCATCAACGCAGGAGGTGTCATCAATGTGGCCGACGAACTCGACGGGTACAACCG  
 TGAGCGGGCGATGAAAAAAGTCGAACTCGTCTATGATGCGGTAGCAAAAGTCATCGAAATTGCCAAACGTG  
 ACCATCTGCCGACTTACCGGGCAGCAGAGAAGATGGCAGAAGAACGGATCGCGACAATGGGCAGTGCCCCG  
 CAGCCAGTTCTTACGCCGGGATAAAAACATTTTAGGATCACGCGGTAA

### 1.3 Calculation of E factors

E factors were calculated as  $\text{Weight}_{\text{waste}}/\text{Weight}_{\text{product}}$ . The calculations did not take into account the waste generated for the preparation of the catalysts.

#### (1) 12 $\alpha$ -HSDH/7 $\alpha$ -HSDH/LeuDH system, 100 mM CA, 250 mM TMP, 50 mL (this work).

|          | Compound                                 | Weight<br>(mg) | Quantity<br>(mg per mg products) |
|----------|------------------------------------------|----------------|----------------------------------|
| Product  | 7,12-dioxo-LCA + L- <i>tert</i> -leucine | 1600 + 850     |                                  |
|          | CA                                       | 400            | 0.16                             |
|          | Trimethylpyruvic acid                    | 750            | 0.31                             |
|          | Cells                                    | 1000           | 0.41                             |
| Waste    | Ammonium chloride                        | 2650           | 1.08                             |
|          | H <sub>2</sub> O                         | 50000          | 20.4                             |
|          | 1 M HCl                                  | 1200           | 0.49                             |
|          | Ethanol                                  | 39500          | 16.1                             |
| E factor | Including water                          |                | 38.9                             |
|          | Excluding water                          |                | 18.5                             |

#### (2) O<sub>2</sub>/NOX system, 10 mM CA, 75 mL, flow reactor (ref. 43).

|  | Compound | Weight | Quantity |
|--|----------|--------|----------|
|--|----------|--------|----------|

|                       |                   | (mg)  | (mg per mg product) |
|-----------------------|-------------------|-------|---------------------|
| Product               | 12-oxo-CDCA       | 297   |                     |
|                       | CA                | 3     | 0.01                |
|                       | NAD <sup>+</sup>  | 35.5  | 0.12                |
|                       | 12 $\alpha$ -HSDH | 0.26  | 0.001               |
| Waste                 | NOX               | 37.5  | 0.13                |
|                       | MeOH              | 5925  | 19.9                |
|                       | 50 mM KPi pH 8.0  | 640   | 2.15                |
|                       | H <sub>2</sub> O  | 67500 | 227.3               |
| E factor <sup>a</sup> | Including water   |       | 249.6               |
|                       | Excluding water   |       | 22.3                |

<sup>a</sup> The calculations did not take into account the downstream processes.

### (3) Syringaldazine/MtLac system, 120 mM CA, 410 mL (ref. 44).

|          | Compound          | Weight<br>(mg) | Quantity<br>(mg per mg product) |
|----------|-------------------|----------------|---------------------------------|
| Product  | 12-oxo-CDCA       | 18400          |                                 |
|          | CA                | 1600           | 0.09                            |
|          | NAD <sup>+</sup>  | 136            | 0.007                           |
|          | Syringaldazine    | 21             | 0.001                           |
|          | 12 $\alpha$ -HSDH | 5.33           | 0.0003                          |
| Waste    | <i>MtLac</i>      | 139            | 0.008                           |
|          | DMSO              | 45100          | 2.45                            |
|          | 100 mM KPi pH 7.2 | 6700           | 0.36                            |
|          | H <sub>2</sub> O  | 369000         | 20.1                            |
|          | Diethyl ether     | 710000         | 38.9                            |
| E factor | Including water   |                | 61.6                            |
|          | Excluding water   |                | 41.5                            |

**(4) Pyruvate/LDH system, 200 mM CA, 100 mL (ref. 36).**

|          | Compound          | Weight<br>(mg) | Quantity<br>(mg per mg product) |
|----------|-------------------|----------------|---------------------------------|
| Product  | 12-oxo-CDCA       | 6800           |                                 |
|          | CA                | 1200           | 0.18                            |
|          | Pyruvate          | 2640           | 0.39                            |
|          | NAD <sup>+</sup>  | 35.5           | 0.005                           |
| Waste    | Cells             | 1000           | 0.15                            |
|          | 100 mM KPi pH 8.0 | 1720           | 0.25                            |
|          | H <sub>2</sub> O  | 100000         | 14.7                            |
|          | 1 M HCl           | 4800           | 0.71                            |
|          | Ethanol           | 79000          | 11.6                            |
| E factor | Including water   |                | 28.0                            |
|          | Excluding water   |                | 13.3                            |

**(5) Acetone/Alcohol Dehydrogenase (ADH) system, 100 mM CA, 10 mL (ref. 42).**

|         | Compound            | Weight<br>(mg) | Quantity<br>(mg per mg product) |
|---------|---------------------|----------------|---------------------------------|
| Product | 12-oxo-CDCA         | 170            |                                 |
|         | CA                  | 230            | 1.35                            |
|         | Acetone             | 1970           | 11.6                            |
|         | NADP <sup>+</sup>   | 0.75           | 0.004                           |
|         | 12 $\alpha$ -HSDH   | 16.7           | 0.1                             |
| Waste   | Dithiothreitol      | 1.6            | 0.01                            |
|         | Bovine serumalbumin | 60             | 0.35                            |
|         | 100 mM KPi pH 8.0   | 172            | 1.01                            |
|         | H <sub>2</sub> O    | 10000          | 58.8                            |
|         | Ethyl acetate       | 9000           | 52.9                            |

|          |                 |       |
|----------|-----------------|-------|
| E factor | Including water | 126.2 |
|          | Excluding water | 67.4  |

**(6)  $\alpha$ -Ketoglutarate/Glutamate Dehydrogenase (GluDH) system, 100 mM CA, 70 mL (ref. 39).**

|          | Compound                | Weight<br>(mg) | Quantity<br>(mg per mg products) |
|----------|-------------------------|----------------|----------------------------------|
| Product  | 12-oxo-CDCA             | 2464           |                                  |
| Waste    | CA                      | 336            | 0.14                             |
|          | $\alpha$ -Ketoglutarate | 1691           | 0.69                             |
|          | NADP <sup>+</sup>       | 3.5            | 0.001                            |
|          | 12 $\alpha$ -HSDH       | 10.8           | 0.004                            |
|          | GLuDH                   | 0.58           | 0.0002                           |
|          | Dithiothreitol          | 11             | 0.004                            |
|          | Sodium azide            | 14             | 0.006                            |
|          | Ammonium acetate        | 1348           | 0.55                             |
|          | 100 mM KPi pH 8.0       | 1207           | 0.49                             |
|          | H <sub>2</sub> O        | 70000          | 28.4                             |
|          | Acetone                 | 276500         | 112.2                            |
|          | Ethanolamine            | 427            | 0.17                             |
| E factor | Including water         |                | 142.7                            |
|          | Excluding water         |                | 114.3                            |



## 2. Supporting Tables

**Table S1.** Primers used for constructing recombinant *E. coli* strains.

| Primer                            | Sequence (5'-3')                                             |
|-----------------------------------|--------------------------------------------------------------|
| mcs1-12 $\alpha$ -FP<br>(BamH I ) | TCATCACCACAGCCA <u>GGATCC</u> GATGAAACTGCGCGGAAGA            |
| mcs1-12 $\alpha$ -RP (Hind III)   | TTAAGCATTATGCGGCCGC <u>AAGCTT</u> TACC GCAGCTTGATGCTGC       |
| mcs1-7 $\alpha$ -FP (BamH I )     | TCATCACCACAGCCA <u>GGATCC</u> GATGTTAATTCTGACAACC            |
| mcs1-7 $\alpha$ -RP (Hind III)    | TTAAGCATTATGCGGCCGC <u>AAGCTT</u> TTAATTGAGCTCCTGTAC         |
| mcs1-Es-FP (BamH I )              | TCATCACCACAGCCA <u>GGATCC</u> GATGGTTGAAACAAACG              |
| Mcs1-Es-RP (Hind III)             | TTAAGCATTATGCGGCCGC <u>AAGCTT</u> TTAACCGCGTGATCCT           |
| mcs2-12 $\alpha$ -FP (Nde I )     | GTATAAGAAGGAGATATA <u>CATATG</u> ATGAAACTGCGCGGAAGACCGC      |
| mcs2-12 $\alpha$ -RP (Kpn I )     | TTTCTTTACCAGACTCGAG <u>GGTACC</u> TACC GCAGCTTGATGCT         |
| mcs2-7 $\alpha$ -FP (Nde I )      | GTATAAGAAGGAGATATA <u>CATATG</u> ATGTTAATTCTGACAACCTGAGACTCG |
| mcs2-7 $\alpha$ -RP (Kpn I )      | TTTCTTTACCAGACTCGAG <u>GGTACC</u> TTAATTGAGCTCCTGTA          |
| mcs2-Es-FP(Nde I )                | GTATAAGAAGGAGATATA <u>CATATG</u> ATGGTTGAAACAAACGTAGAAGCACG  |
| mcs2-RP(Kpn I )                   | TTTCTTTACCAGACTCGAG <u>GGTACC</u> TTAACCGCGTGATCCTAAAATGTT   |
| pETDuet-MCS1-FP                   | ATCGGTGATGTCGGCGATAT                                         |
| pRSFDuet-MCS1-FP                  | GTTTTGCGCCATTCGATGGT                                         |
| Duet-MCS1-RP                      | GATTATGCGGCCGTGTACAA                                         |
| Duet-MCS2-FP                      | TTGTACACGGCCGCATAATC                                         |
| Duet-MCS2-RP                      | TGCTAGTTATTGCTCAGCGG                                         |

**Table S2.** Strains and plasmids used in this study.

| Strain and plasmids                             | Relevant characteristics                                                                                                | Source           |
|-------------------------------------------------|-------------------------------------------------------------------------------------------------------------------------|------------------|
| pRSFDuet-1                                      | double T7 promoters, RSF ori, Kan <sup>R</sup>                                                                          | Novagen          |
| pETDuet-1                                       | double T7 promoters, pBR322 ori, Amp <sup>R</sup>                                                                       | Novagen          |
| pET28a (+)                                      | T7 promoter, pBR322 ori, Kan <sup>R</sup>                                                                               | Novagen          |
| pET28a (+)- <i>Rr12α</i> -HSDH                  | pET28a (+) carrying <i>12α-hsdh</i>                                                                                     | laboratory stock |
| pET28a (+)- <i>Ec7α</i> -HSDH                   | pET28a (+) carrying <i>7α-hsdh</i>                                                                                      | laboratory stock |
| pET28a (+)- <i>EsLeuDh</i>                      | pET28a (+) carrying <i>leudh</i>                                                                                        | laboratory stock |
| pRSFDuet- <i>Rr12α</i> -HSDH- <i>EsLeuDh</i>    | pRSFDuet carrying <i>12α-hsdh</i> and <i>leudh</i>                                                                      | this study       |
| pRSFDuet- <i>Rr12α</i> -HSDH                    | pRSFDuet carrying <i>12α-hsdh</i>                                                                                       | this study       |
| pRSFDuet- <i>Rr12α</i> -HSDH- <i>Ec7α</i> -HSDH | pRSFDuet carrying <i>12α-hsdh</i> and <i>7α-hsdh</i>                                                                    | this study       |
| pRSFDuet- <i>EsLeuDh</i> - <i>Rr12α</i> -HSDH   | pRSFDuet carrying <i>leudh</i> and <i>12α-hsdh</i>                                                                      | this study       |
| pRSFDuet- <i>EsLeuDh</i>                        | pRSFDuet carrying <i>leudh</i>                                                                                          | this study       |
| pRSFDuet- <i>EsLeuDh</i> - <i>Ec7α</i> -HSDH    | pRSFDuet carrying <i>leudh</i> and <i>7α-hsdh</i>                                                                       | this study       |
| pETDuet- <i>Ec7α</i> -HSDH                      | pETDuet carrying <i>7α-hsdh</i>                                                                                         | this study       |
| pETDuet- <i>Ec7α</i> -HSDH- <i>EsLeuDh</i>      | pETDuet carrying <i>7α-hsdh</i> and <i>leudh</i>                                                                        | this study       |
| pETDuet- <i>Rr12α</i> -HSDH                     | pETDuet carrying <i>12α-hsdh</i>                                                                                        | this study       |
| pETDuet- <i>Rr12α</i> -HSDH- <i>Ec7α</i> -HSDH  | pETDuet carrying <i>12α-hsdh</i> and <i>7α-hsdh</i>                                                                     | this study       |
| pETDuet- <i>EsLeuDh</i>                         | pETDuet carrying <i>leudh</i>                                                                                           | this study       |
| Strain 1                                        | <i>E. coli</i> BL21(DE3)/(pRSFDuet- <i>Rr12α</i> -HSDH- <i>EsLeuDh</i> and pETDuet- <i>Ec7α</i> -HSDH- <i>EsLeuDh</i> ) | this study       |
| Strain 2                                        | <i>E. coli</i> BL21(DE3)/(pRSFDuet- <i>Rr12α</i> -HSDH and pETDuet- <i>Ec7α</i> -HSDH- <i>EsLeuDh</i> )                 | this study       |

|          |                                                                                                                                           |            |
|----------|-------------------------------------------------------------------------------------------------------------------------------------------|------------|
| Strain 3 | <i>E. coli</i> BL21(DE3)/(pRSFDuet- <i>EsLeuDH-Rr12<math>\alpha</math>-HSDH</i> and pETDuet- <i>Ec7<math>\alpha</math>-HSDH-EsLeuDH</i> ) | this study |
| Strain 4 | <i>E. coli</i> BL21(DE3)/(pRSFDuet- <i>Rr12<math>\alpha</math>-HSDH-EsLeuDH</i> and pETDuet- <i>Ec7<math>\alpha</math>-HSDH</i> )         | this study |
| Strain 5 | <i>E. coli</i> BL21(DE3)/(pRSFDuet- <i>EsLeuDH-Rr12<math>\alpha</math>-HSDH</i> and pETDuet- <i>Ec7<math>\alpha</math>-HSDH</i> )         | this study |
| Strain 6 | <i>E. coli</i> BL21(DE3)/(pRSFDuet- <i>EsLeuDH</i> and pETDuet- <i>Rr12<math>\alpha</math>-HSDH-Ec7<math>\alpha</math>-HSDH</i> )         | this study |
| Strain 7 | <i>E. coli</i> BL21(DE3)/(pRSFDuet- <i>EsLeuDH-Ec7<math>\alpha</math>-HSDH</i> and pETDuet- <i>Rr12<math>\alpha</math>-HSDH</i> )         | this study |
| Strain 8 | <i>E. coli</i> BL21(DE3)/(pRSFDuet- <i>Rr12<math>\alpha</math>-HSDH-Ec7<math>\alpha</math>-HSDH</i> and pETDuet- <i>EsLeuDH</i> )         | this study |

---

### 3. Supporting Figures

(A)

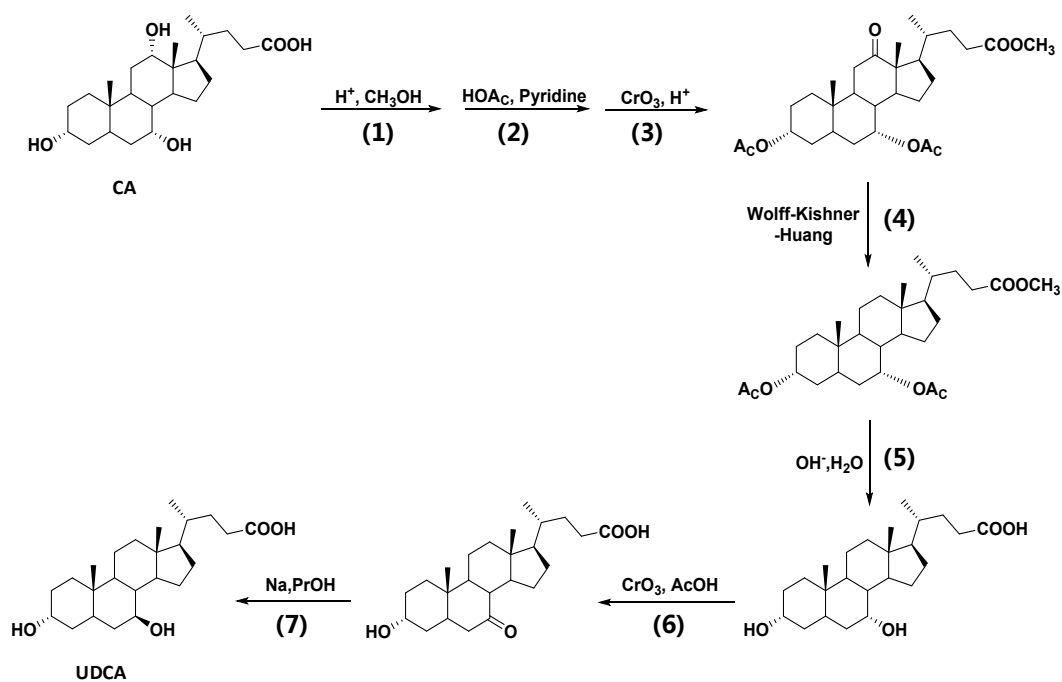

(B)

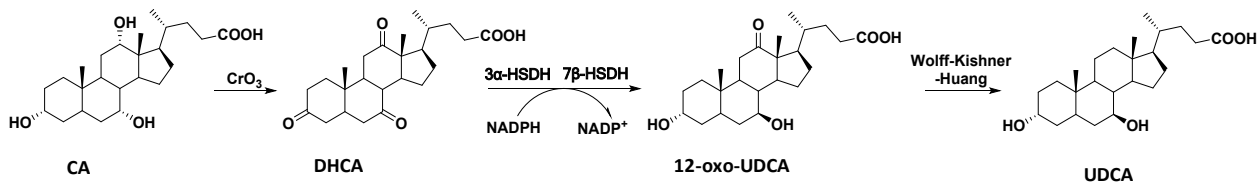

(C)

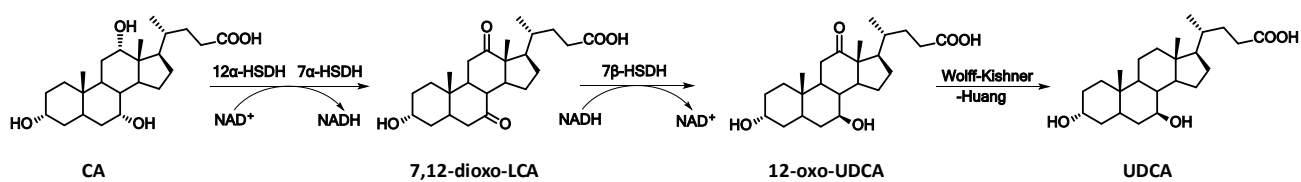

**Figure S1.** Synthesis of UDCA from CA by chemical (A) or chemo-enzymatic methods (B and C).

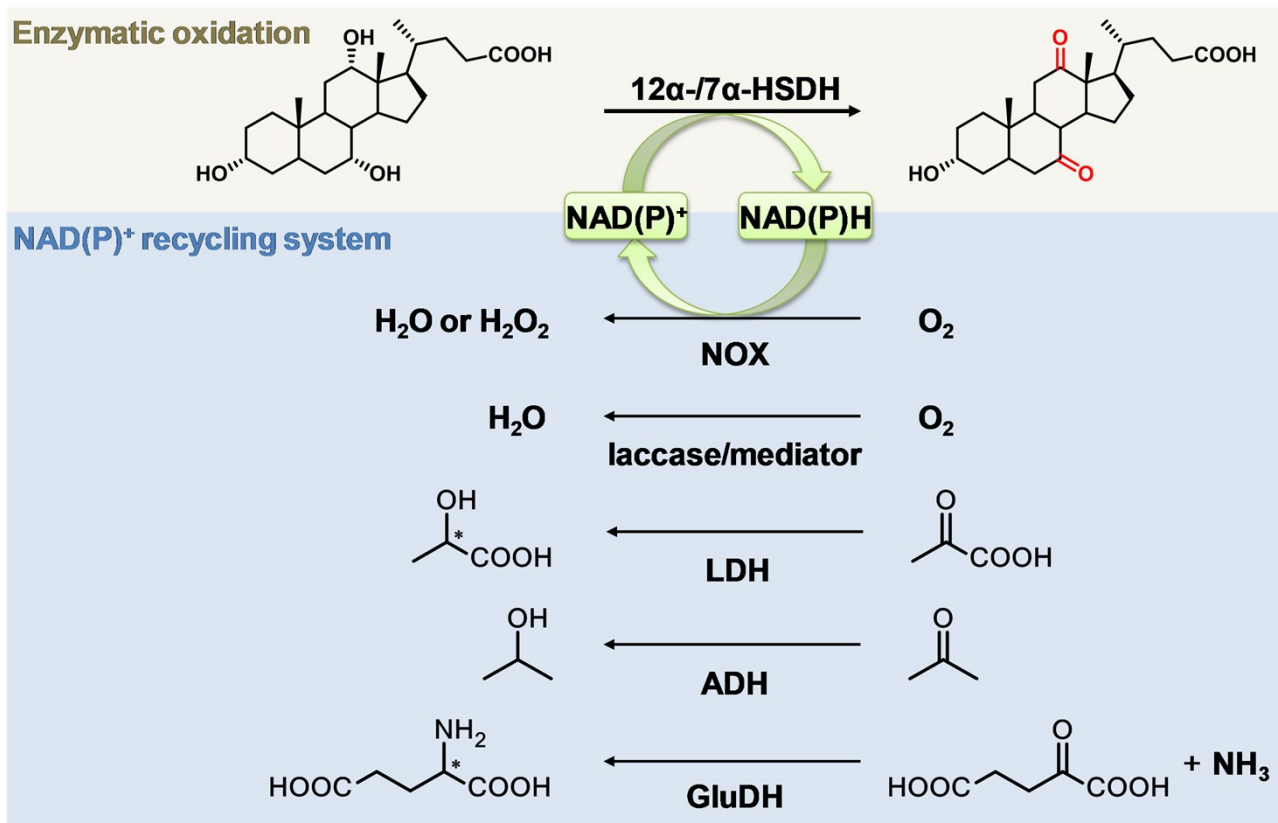

**Figure S2.** Currently available NAD(P)<sup>+</sup>-recycling systems for the biocatalytic oxidation of CA.

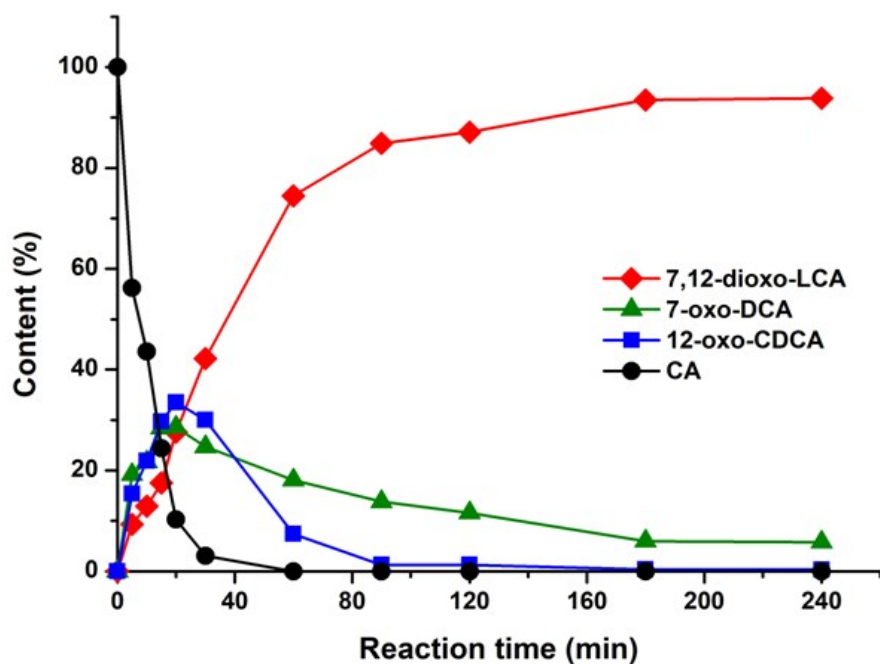

**Figure S3.** Reaction progress curves of the self-sufficient hydride-shuttling cascade via *in vitro* biocatalysis. Reaction conditions: 10 mL reaction mixture, containing 25 mM CA, 75 mM TMP, 0.1 mM NAD<sup>+</sup>, lyophilized cell-free extracts of *Rr12α*-HSDH, *Ec7α*-HSDH and *EsLeuD*H (5 U mL<sup>-1</sup> each), and NH<sub>4</sub>Cl/NH<sub>4</sub>OH buffer (1 M, pH 9.5), was incubated at 30°C and 200 rpm, the samples were withdrawn at regular intervals for HPLC analysis.

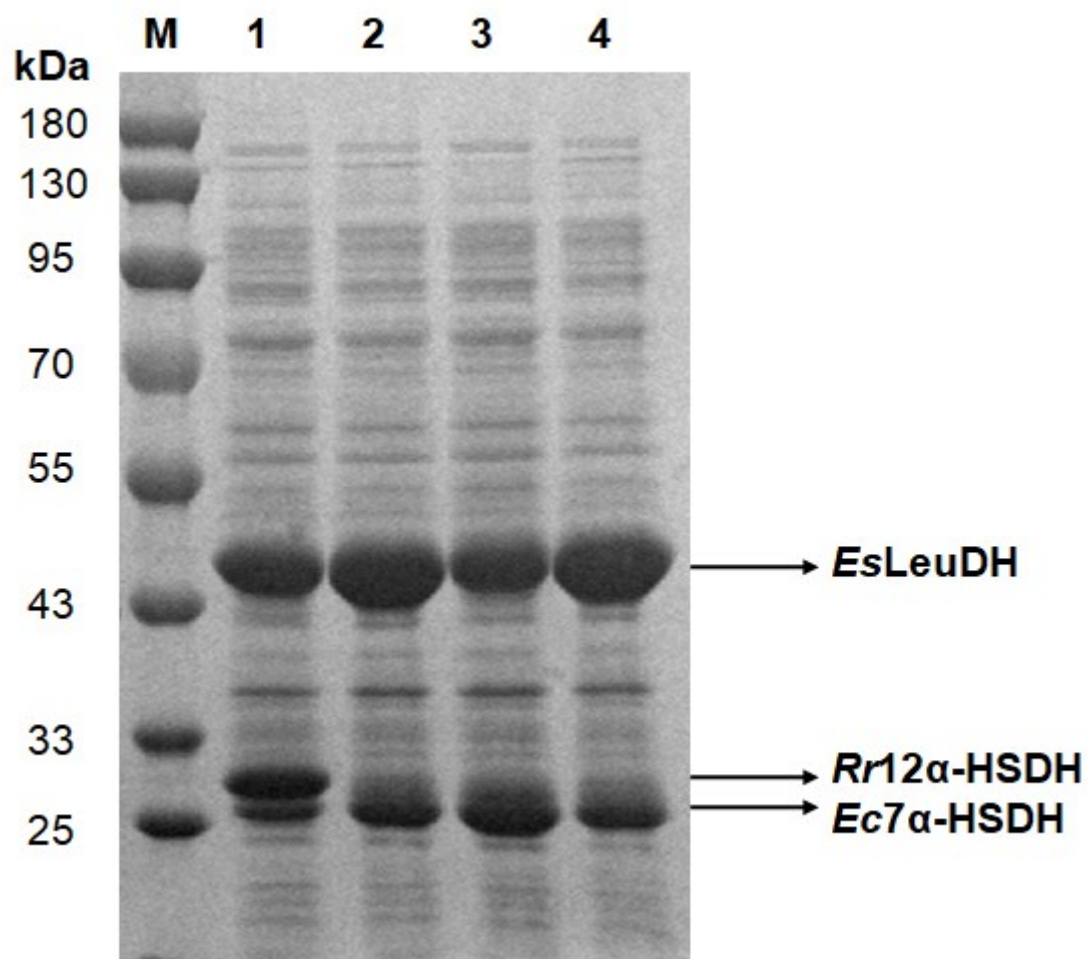

**Figure S4.** SDS-PAGE analysis of whole-cell proteins expressed in selected *E. coli* strains. Lane M: protein marker (kDa); Lanes 1–4 represent strain 2, strain 4, strain 6 and strain 8, respectively.

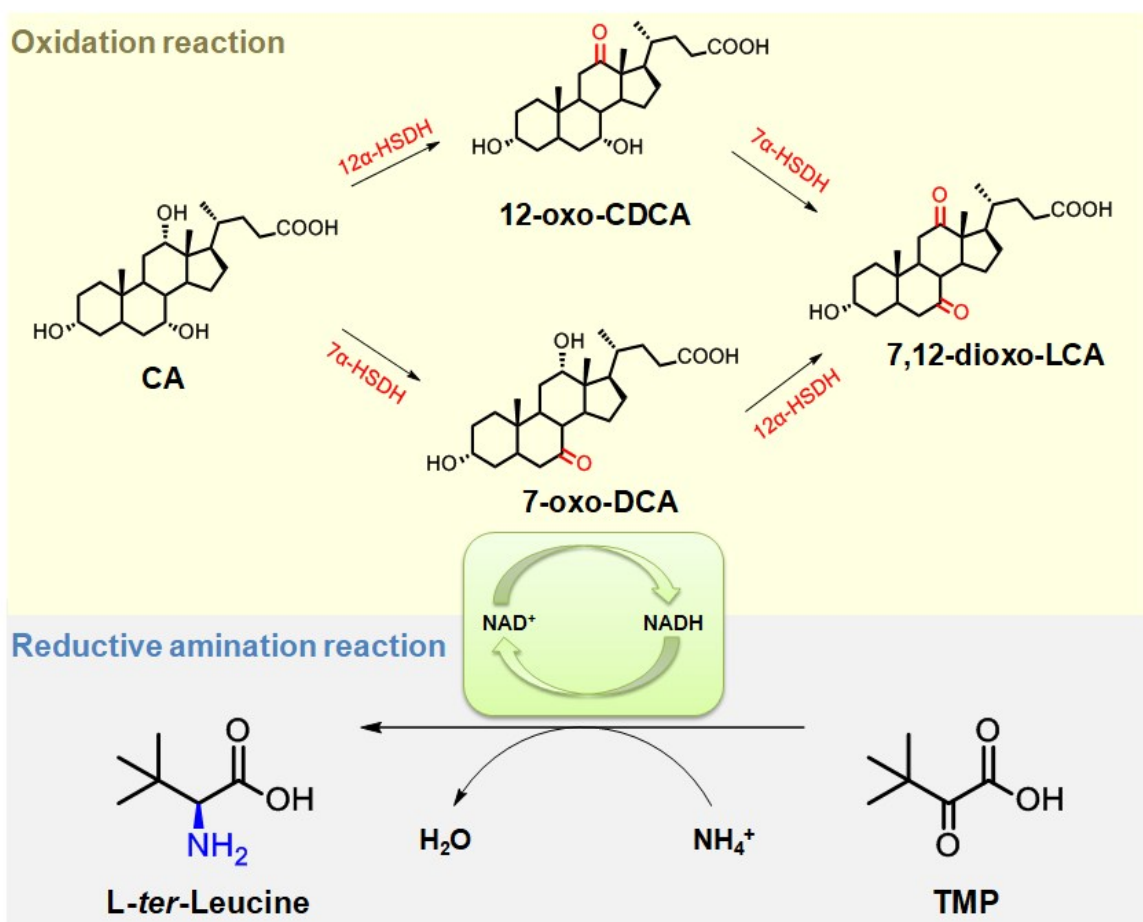

**Figure S5.** A detailed synthetic roadmap of the smart self-sufficient hydride-shuttling cascade for concurrently biosynthesis of 7,12-dioxo-LCA and L-tert-leucine.



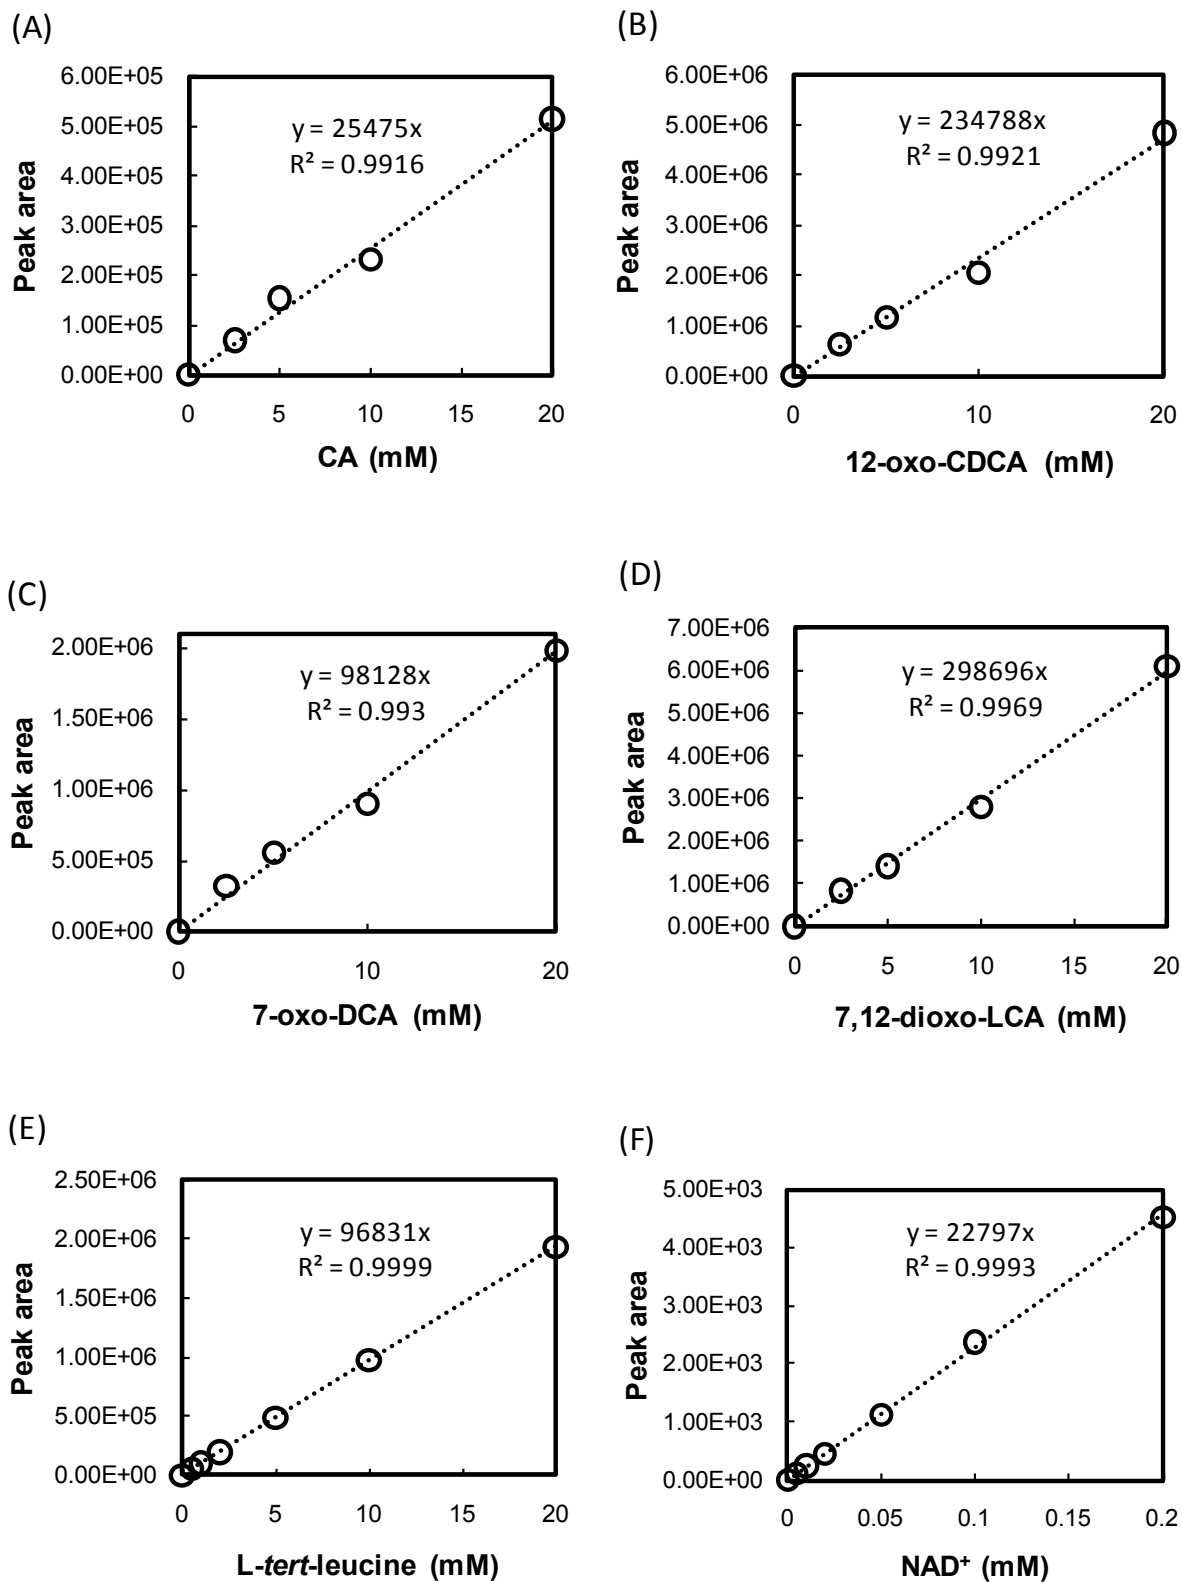

Figure S6. Calibration curves of CA (A), 12-oxo-CDCA (B), 7-oxo-DCA (C), 7,12-dioxo-LCA (D), L-tert-leucine (E), and NAD<sup>+</sup>

(F).

## 4. HPLC spectra

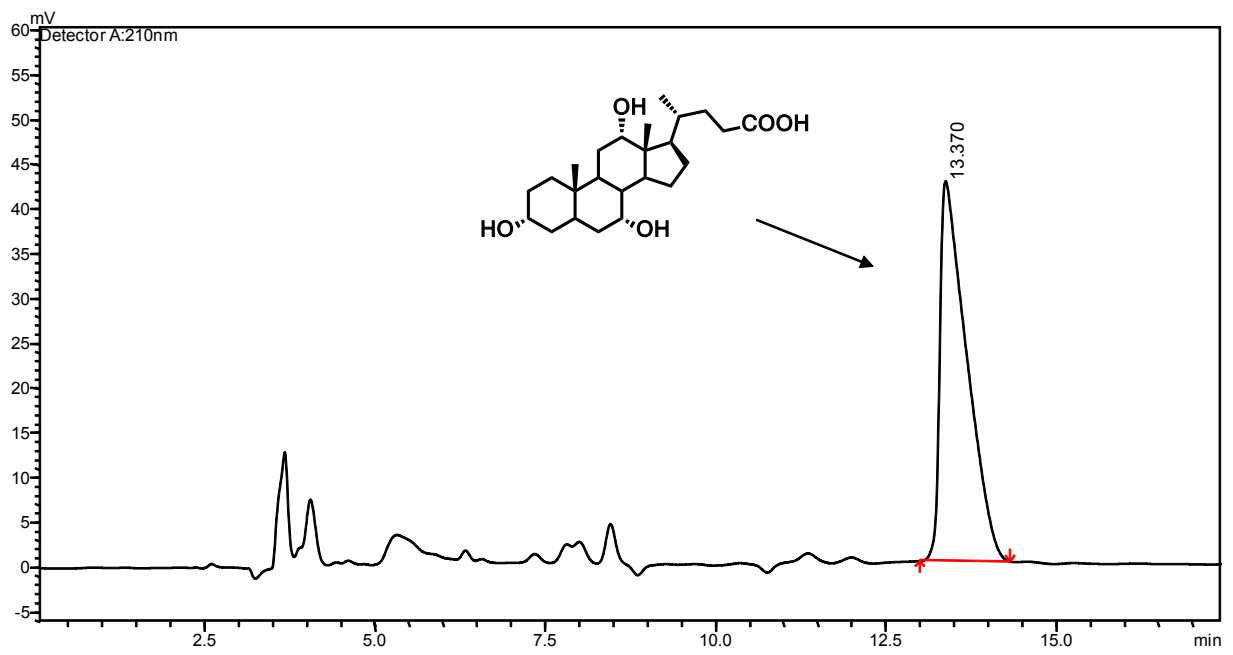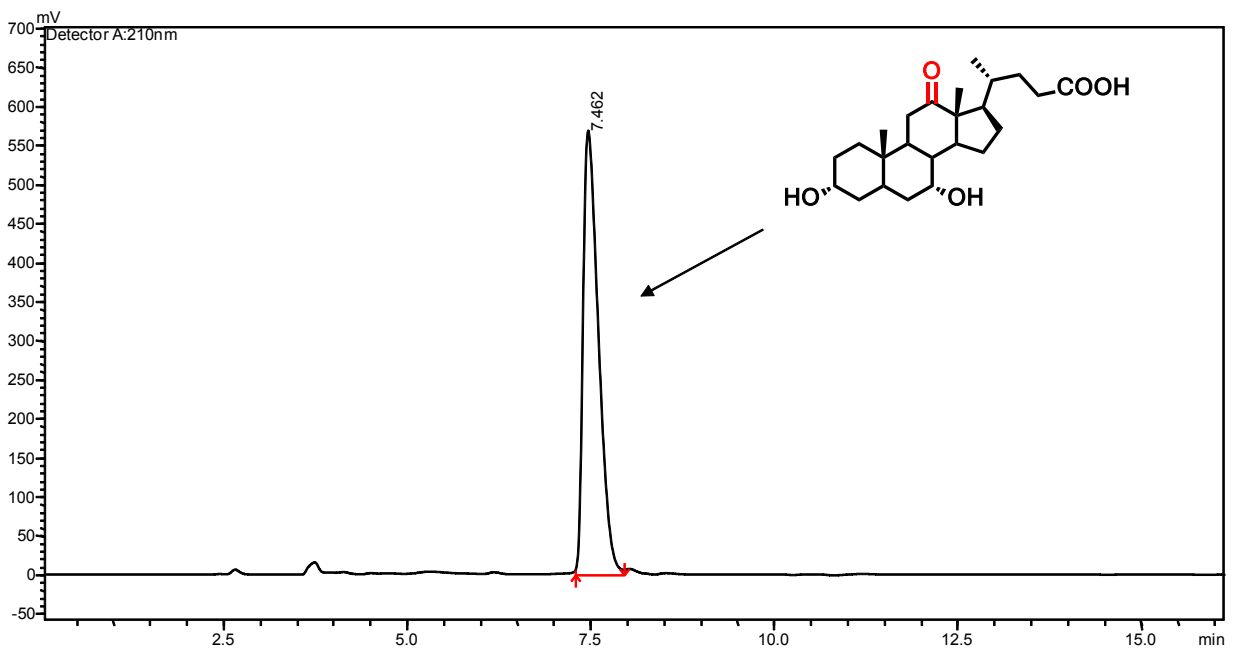

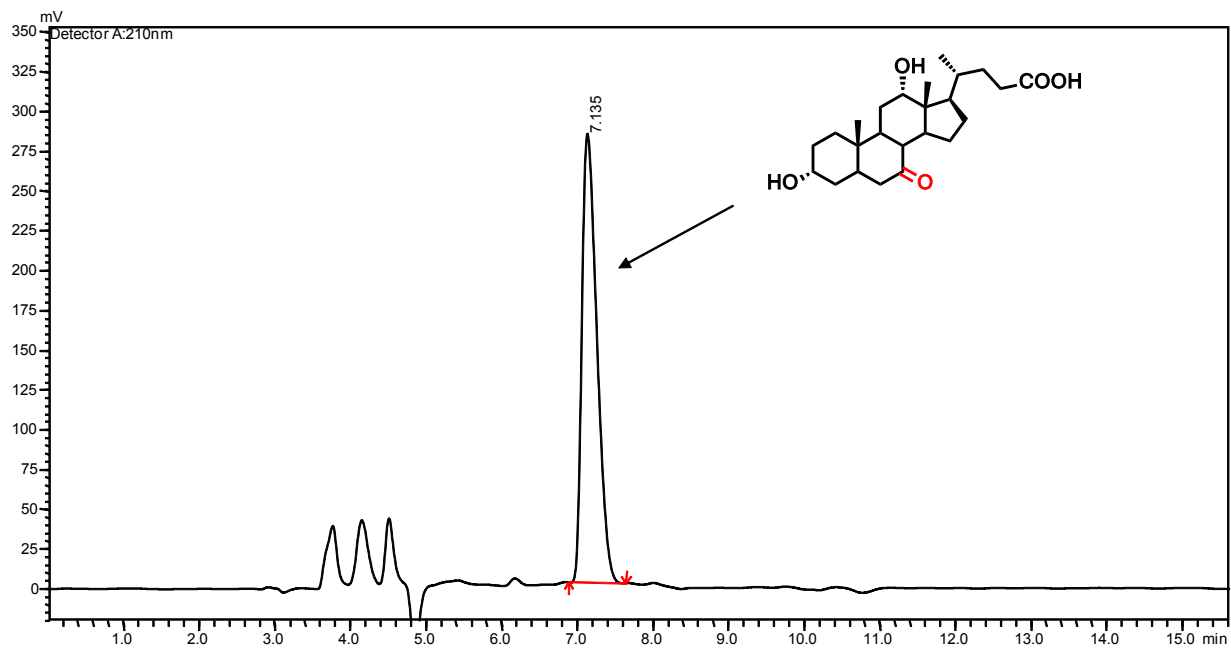

Standard 7-oxo-DCA.

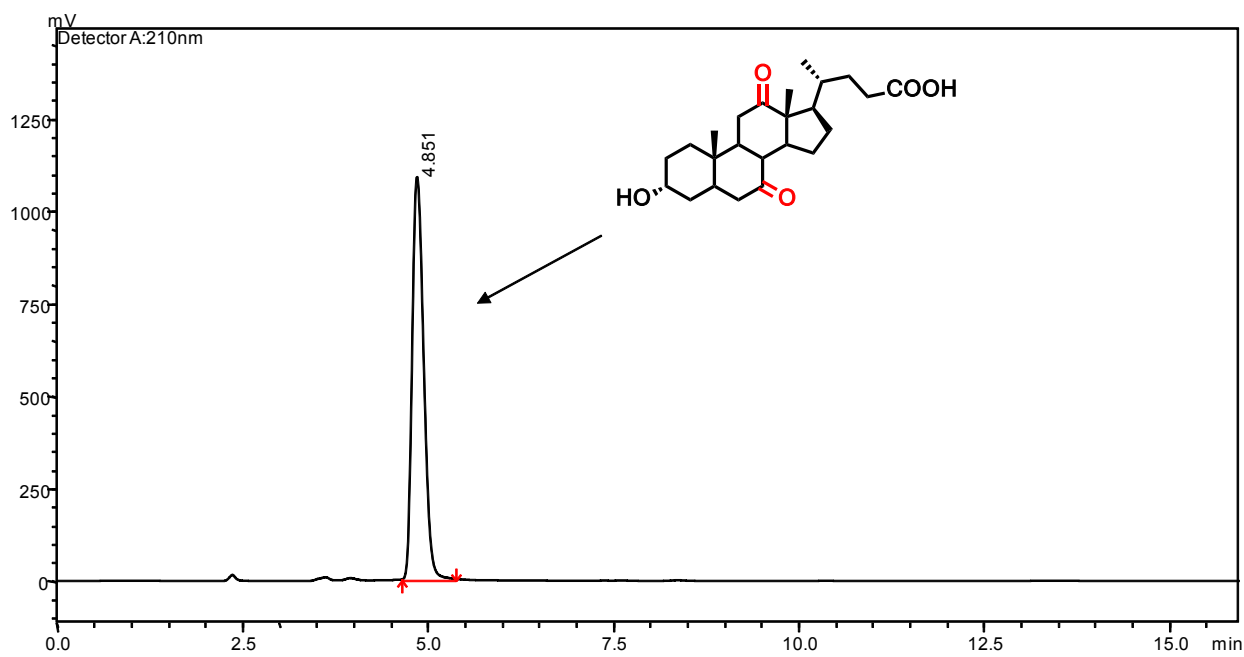

Standard 7,12-dioxo-LCA.

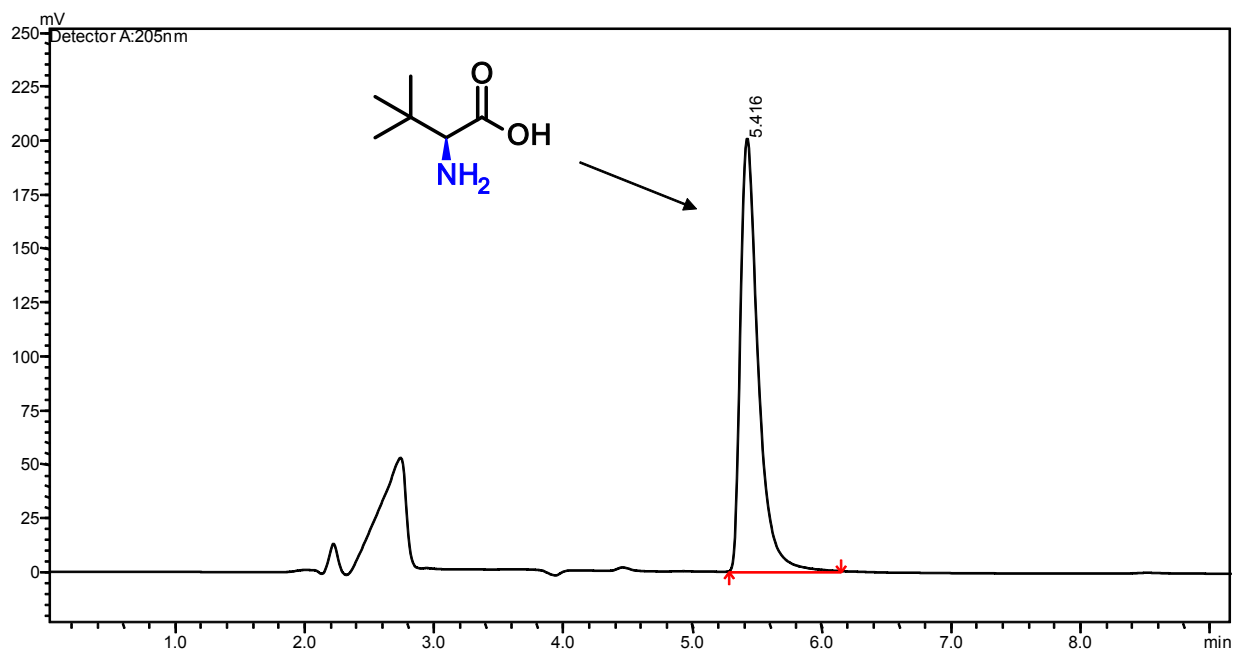

Standard L-*tert*-Leucine.

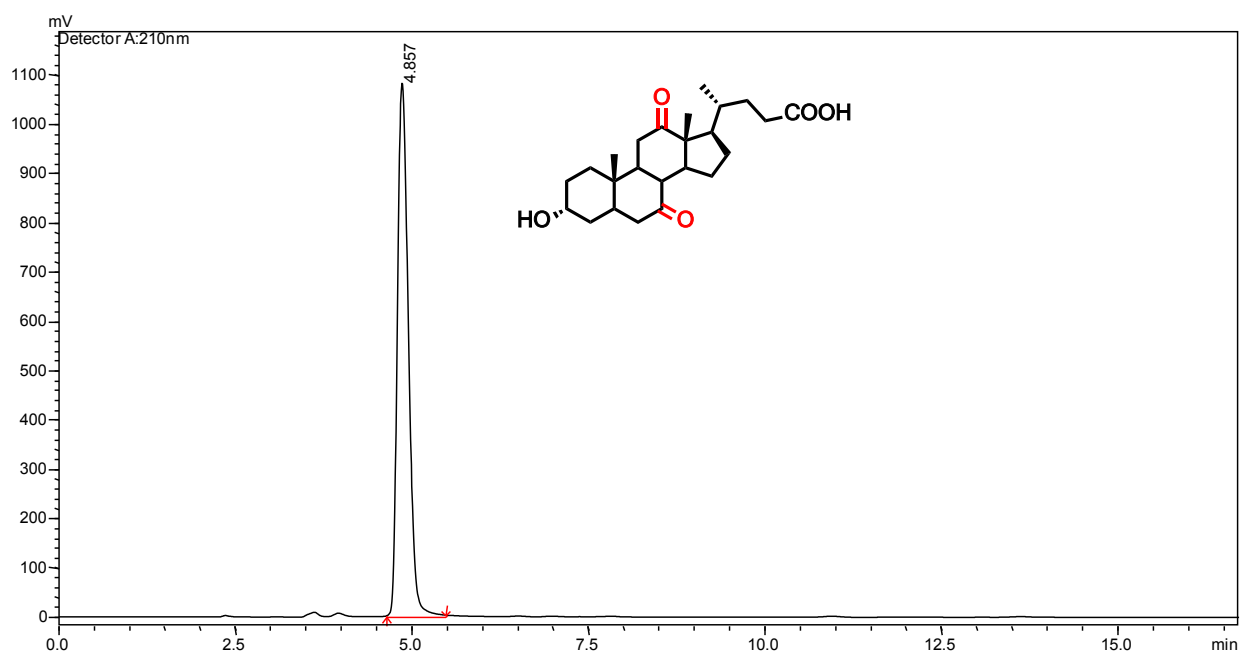

The 7,12-dioxo-LCA prepared by enzymatic cascade reaction.

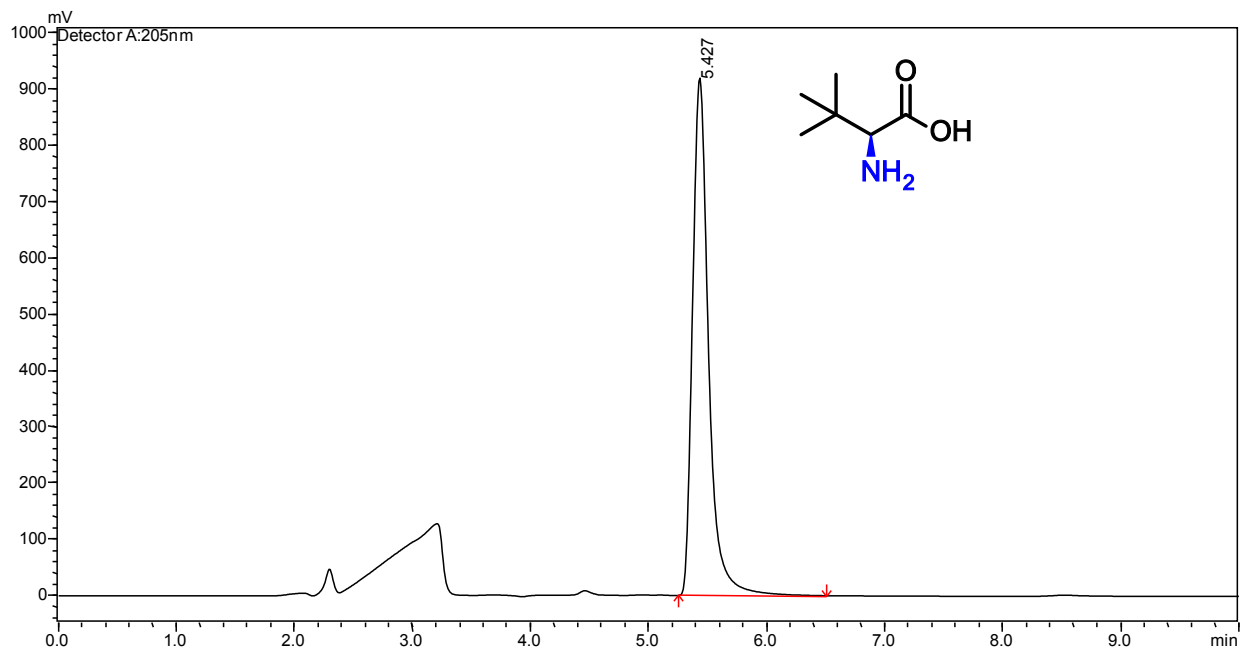

The L-*tert*-Leucine prepared by enzymatic cascade reaction.

## 5. $^1\text{H}$ NMR and $^{13}\text{C}$ NMR spectra

### 5.1 NMR of product 7,12-dioxo-LCA prepared by enzymatic cascade reaction

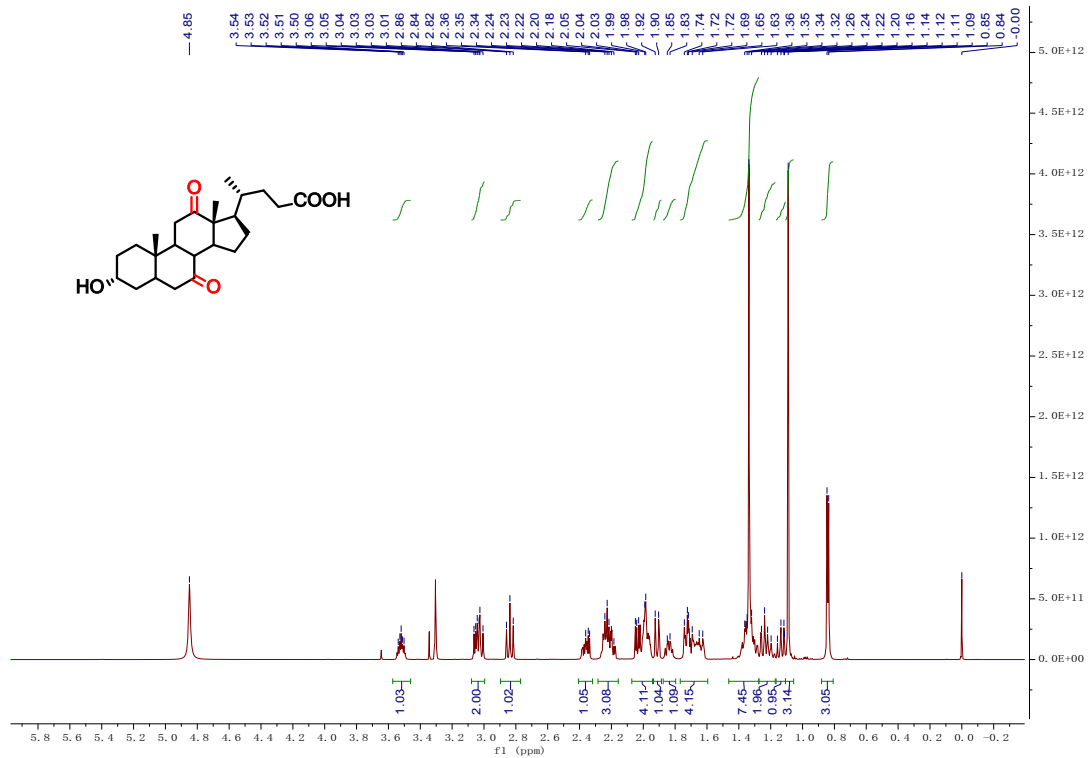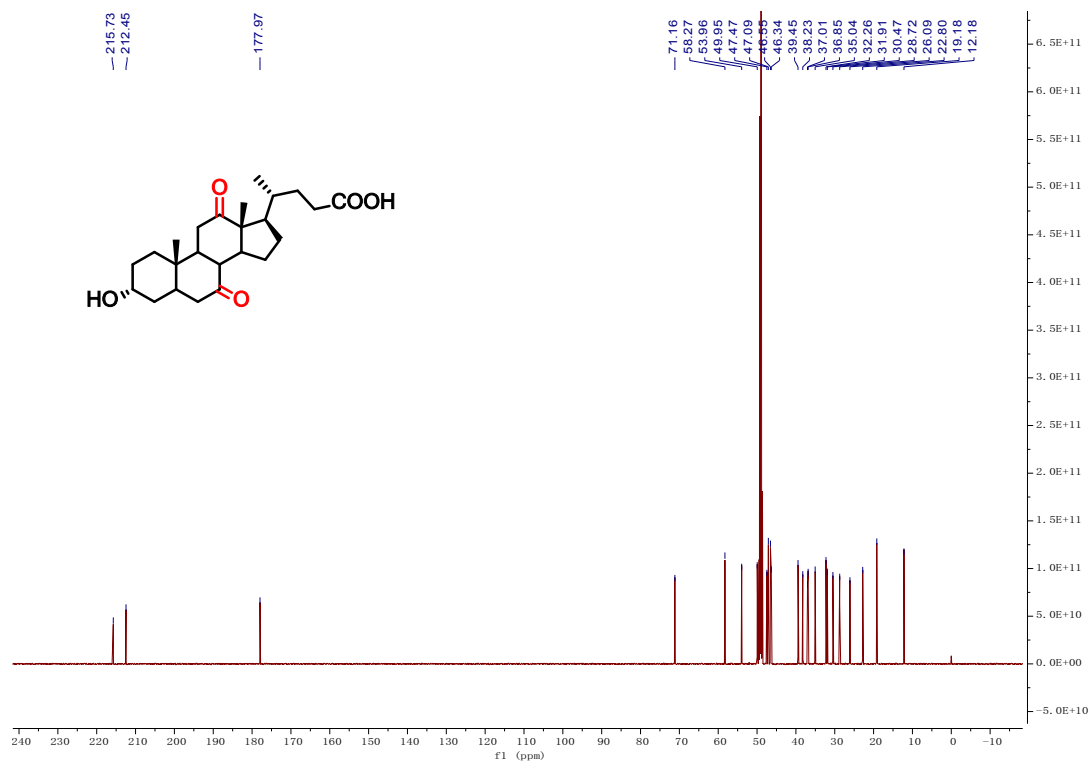

## 5.2 NMR of product L-*tert*-Leucine prepared by enzymatic cascade reaction

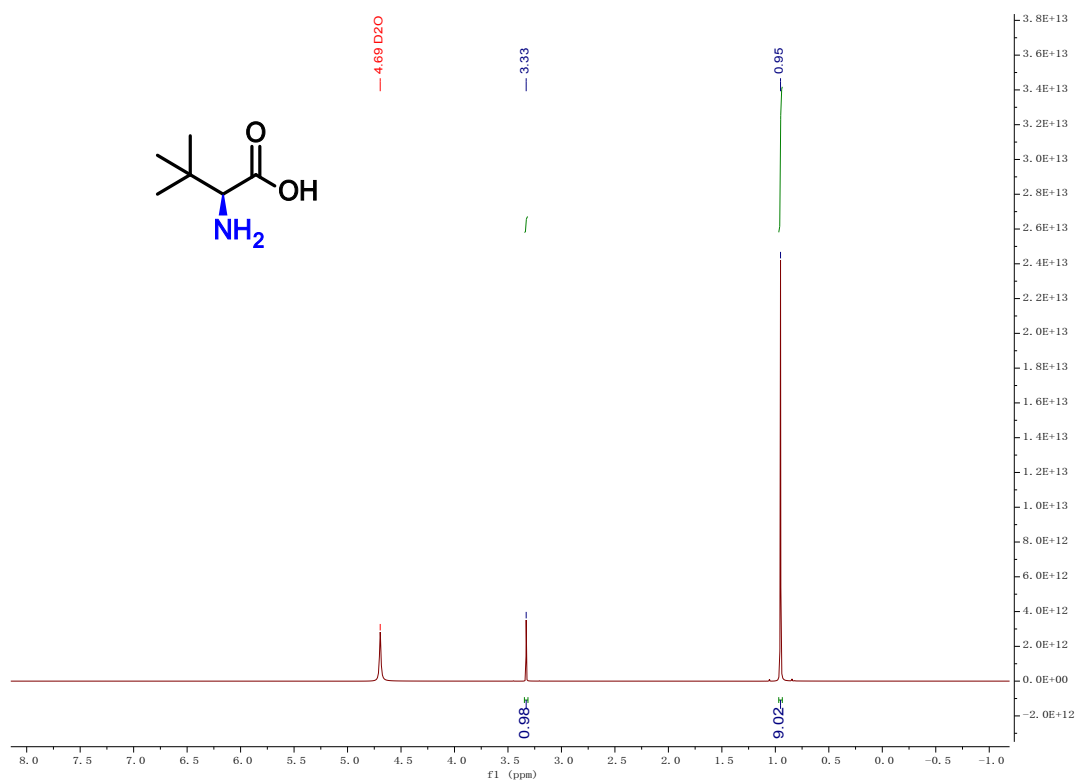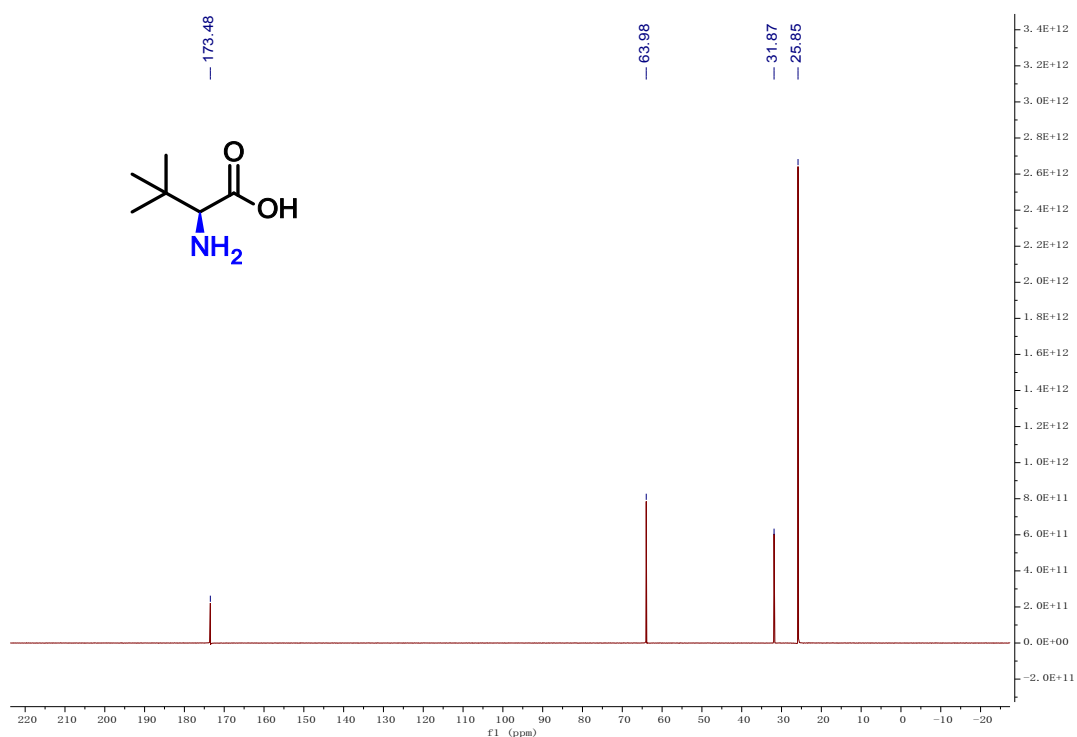

## 6. References

- (S1) S. C. Shi, Z. N. You, K. Zhou, Q. Chen, J. Pan, X. L. Qian, J. H. Xu and C. X. Li, *Adv. Synth. Catal.*, 2019, **361**, 4661–4668.
- (S2) M. M. Zheng, K. C. Chen, R. F. Wang, H. Li, C. X. Li and J. H. Xu, *J. Agric. Food. Chem.*, 2017, **65**, 1178–1185.
- (S3) J. Li, J. Pan, J. Zhang and J. H. Xu, *J. Mol. Catal. B: Enzym.*, 2014, **105**, 11–17.
